# Supplementary material for: Which cardiac parameters best predict the cardiovascular outcomes among patients with anti-PD-1 immunotherapy-induced myocardial injury?
Source: Frontiers journal article supplement (doi:10.3389/fcvm.2022.922095), 2022-09-23
Supplement: Table_1.XLSX [file Table_1.XLSX]

## Sheet: Sheet1
ID	性别（男=0，女=1）	心血管症状有无（有=1，无=0）	水肿（是=1，否=0）	心绞痛（是=1，否=0）	心悸（是=1，否=0）	肌肉疼痛（是=1，否=0）	胸闷气促（是=1，否=0）	第几次PD1肌钙蛋白升高	年龄	收缩压(mmhg)	舒张压(mmhg)	血氧饱和度	脉搏(次分)	TPS评分	肿瘤类型（非小细胞肺癌=1，肝癌=2，食管癌=3，其他=,4）	高血压（0=否，1=是）	糖尿病（0=否，1=是）	高血脂（0=否，1=是）	肾功能不全（是=1，否=0）	中风（0=否，1=是）	肺疾病 copd哮喘（0=否，1=是）	冠心病（0=否，1=STEMI，2=NSTEMI,3=UA,4=SA,）	甲功(正常=0，甲减=1，甲亢=2）	心功能分级（1=I级，2=II级，3=III级，4=IV级）	阿司匹林（0=否，1=是）	bBlocker（0=否，1=是）	他汀（0=否，1=是）	速尿（0=否，1=是）	螺内酯（0=否，1=是）	ACEi/ARB（0=否，1=是）	正性肌力药（0=否，1=是）	糖皮质激素（0=否，1=是）	血红蛋白（gl）	白细胞（10^9l）	血小板（10^9l）	ALT(ul)	AST(ul)	ALB(gl)	钾(mmoll)	肌酐(umoll)	CK（ul）	CK-Mb（ul）	cTnT(pgml)	NTpro-BNP	CRP（mgl）	ESR	LA（mm）	LV（mm）	RA（mm）
	0	1	0	0	1	1	1	2	58	128	78	98	88	23	1	0	0	1	0	0	0	0	0	2	0	1	1	1	1	0	1	0	112	7.46	134	67	50	30	3.83	89.4	314	38	84	1248	24.1	44	32	55	27
	0	1	0	0	0	0	1	1	65	130	60	98	70	70	1	0	1	0	0	0	0	0	0	2	0	1	0	1	1	1	0	1	102	11	189	34	46	37	4.12	78	467	87	54	2800	32.2	39	31	50	28
	0	1	0	0	0	0	1	4	64	98	51	94	112	45	1	0	0	0	0	0	1	0	0	3	0	0	0	1	1	0	1	1	95	12.11	110	40	75	28	4.65	70	1422	124	234	9800	234.5	88	38	58	38
	1	1	1	0	0	0	1	1	59	112	79	98	99	12	1	0	0	0	0	0	1	1	1	2	1	1	0	1	1	1	0	0	102	7	84	50	55	38	4.9	68	246	128	116	2100	56		34	50	32
1725457	0	1	0	1	0	0	1	2	82	131	86	97	101	1	1	0	0	1	1	0	0	1	1	3	1	1	1	1	1	0	1	1	117	12.44	310	121.8	385.6	38.5	4.24	90	6938	166.3	1162	1105		77	38	59	36
	0	1	0	0	0	0	1	1	67	90	59	96	109	48	3	0	0	0	0	0	0	0	0	4	0	0	0	1	1	0	1	1	108	5.76	142	421	346	23.9	4.18	76	128	104	216	12000	199.4	88	40	57	26
	1	1	0	0	0	1	1	2	60	108	56	92	88	48	1	0	1	0	0	1	1	0	1	3	0	1	0	1	1	1	1	1	74	9.98	173	20.5	41	33.2	4.1	134	1209	112	300	8400		78	37	45	36
	0	1	0	0	0	0	1	2	63	109	80	98	78	59	1	0	0	0	0	0	0	0	0	2	0	1	1	1	0	0	1	0	111	7.06	205	13.5	20.1	29.8	3.9	67.8	304	45	34	3600	54	24	34	43	42
	1	1	0	0	0	0	1	1	62	120	78	93	44	96	1	0	0	0	0	0	0	0	1	4	0	0	0	0	0	1	1	1	99	7.68	364	241.6	340.2	33.6	4.39	67.5	268	119	214	7800	56.7	76	38	57	33
	0	1	1	0	0	0	1	1	69	123	67	98	80	66	3	0	0	0	0	0	0	1	1	2	1	1	0	0	1	1	0	0	124	8.15	182	20.9	35	34.2	3.9	62	201	109	112	4300	74.3	44	40	57	36
	0	1	0	0	0	0	1	3	57	104	80	99	68	46	4	0	1	0	0	0	0	0	0	2	0	0	0	0	0	1	0	0	90	4.17	229	13.9	22.2	39	4.01	53.7	321	76	78	1100	34.6		35	45	30
	0	1	0	0	0	0	1	1	71	98	56	97	54	1	1	0	1	0	1	0	0	1	0	4	0	0	0	1	0	0	1	1	112	12.93	144	321.4	195	19.3	4.85	117.2	1514	216	624	4900	88.9	56	40	52	38
	0	1	1	0	0	0	1	1	76	108	42	96	98	76	1	0	0	0	1	0	0	0	0	4	0	0	0	1	0	0	1	1	101	12.43	237	38.8	54.1	32.7	4.07	112.7	1714	201	1321	16000	121.1	77	36	57	35
	0	1	1	0	0	0	1	2	77	112	64	90	88	34	2	0	0	0	1	0	0	1	0	4	1	1	0	1	1	0	1	1	120	8.9	208	143	212	30.1	4.28	120	5321	250	742	35000	56.4	45	44	60	26
	1	1	0	0	0	0	1	1	78	105	58	89	78	89	1	0	0	0	0	0	1	0	0	3	0	0	0	1	0	0	0	0	128	7.78	112	33.3	22.9	33.3	4.8	88.3	998	101	221	2800		88	39	57	35
	1	1	0	0	1	1	0	1	64	123	96	99	88	4	1	0	1	0	0	0	0	0	0	2	0	1	0	1	0	0	0	0	106	11.24	203	19.4	11.5	32.4	3.8	68.8	228	34	177	1340	88.9	34	45	52	38
	0	1	0	0	1	0	0	3	72	167	77	98	78	23	2	0	0	1	0	1	0	0	0	1	0	1	1	0	0	0	0	0	64	5.68	292	14.4	37.6	32.3	3.3	99.1	199	44	89	1890	32.4	24	37	40	35
	0	1	0	1	0	0	0	1	68	115	58	97	78	68	3	0	0	1	0	0	0	0	0	2	1	1	1	0	0	1	0	0	108	3.21	74	20.3	29.3	30.1	4.2	79.3	1499	144	310	980	88.4	38	38	53	37
	0	1	0	1	0	0	1	1	72	142	72	98	46	55	1	1	0	0	0	0	0	0	0	1	1	0	1	1	1	1	0	0	96	5.37	312	46.7	46.2	38	4	102.5	256	76	99	1900	24	33	30	40	24
	0	1	0	1	0	0	1	2	53	139	78	96	88	12	4	0	0	1	0	0	0	0	0	2	1	1	1	0	0	0	0	0	130	7.21	142	24.5	30.9	30	4.7	60.8	221	88	246	980	78.4	12	24	49	27
	0	1	0	1	0	1	0	2	52	117	80	97	78	44	1	0	1	0	0	0	0	0	0	1	0	1	1	0	0	0	0	0	116	3.55	122	27.7	34.7	38	4.6	85.8	240	90	122	1200	34		45	44	30
	0	1	0	0	0	0	0	2	77	109	65	98	88	46	1	0	0	1	0	0	1	0	0	2	1	1	0	1	0	1	1	1	129	10.1	140	57.2	30.7	30	3.85	78.8	120	46	120	2400	88.9	44	42	55	42
	1	0	0	0	0	0	0	1	62	130	89	98	90	26	1	0	1	0	1	0	0	1	0	1	0	1	0	1	1	0	1	0	103	4.22	208	19.2	27.1	28	3.87	236.7	2478	150	716	35000	16.8	50	37	50	36
	0	0	0	0	0	0	0	1	67	144	82	96	67	67	4	0	0	0	0	0	0	0	0	1	0	0	0	1	0	1	0	0	124	5.47	339	56.3	21	31	3.87	99.8	388	67	145	1400	17.8	66	43	50	36
	0	0	0	0	0	0	0	1	60	164	67	98	88	34	1	1	0	0	0	0	0	0	0	1	0	0	0	0	0	1	0	0	95	9.99	279	20.5	18.5	28.5	3.53	88.5	199	9.2	49	812	78	43	39	43	27
	0	0	0	0	0	0	0	1	75	113	80	98	70	45	3	0	1	0	0	1	1	0	1	1	1	0	0	0	0	0	0	0	114	6.41	74	42.9	37.5	30	4.26	99.4	245	19.5	144	314	44	34	37	35	32
	0	0	0	0	0	0	0	3	65	116	68	98	112	12	1	0	0	0	0	0	0	0	0	1	0	0	0	0	0	0	0	0	70	12.83	103	242.4	322.1	31.6	4.32	80.2	667	99	121	458	78.9	74	45	46	38
	0	0	0	0	0	0	0	1	68	119	77	98	99	34	1	0	0	0	0	0	0	0	1	1	0	0	0	0	0	0	0	0	105	8.85	178	13	27.4	29.9	3.72	84.2	78.4	14.8	34	213	15.37	42	30	50	28
	0	0	0	0	0	0	0	2	60	113	70	97	78	48	1	0	0	0	0	0	0	1	1	2	1	1	1	0	0	1	0	0	78	4.73	94	20.7	36.9	36.5	3.85	77.8	51.6	8.3	46	810	16.4	8.3
	1	0	0	0	0	0	0	1	77	105	55	96	109	48	3	0	1	0	0	0	0	0	0	1	0	0	0	0	0	0	0	0	118	5.26	150	18.6	8.6	38.8	2.89	77.7	188.7	17.7	74	684	8.9		29	48	23
	0	0	0	0	0	0	0	2	57	109	67	94	88	2	4	0	1	0	1	0	0	1	0	2	1	1	1	0	1	0	0	0	150	6.7	301	16.9	15	29.3	4.17	80.3	178.1	21.6	56	280	16.8	16	32	40	30
	0	0	0	0	0	1	0	1	74	104	76	98	78	96	1	0	0	0	1	0	0	0	0	2	1	0	0	0	0	0	0	0	125	7.36	119	65.7	16.3	33	4.11	121.4	13222	312	144	1400	32.5	44	36	58	27
	1	0	0	0	0	0	0	1	50	132	74	98	44	66	1	0	0	0	0	0	0	0	0	1	0	0	0	0	0	0	0	0	134	10.41	296	23.9	21.1	32.9	4.68	71.5	344	12.8	46	320	12.1	3.4	32	43	37
	0	0	0	0	0	0	0	2	56	111	69	98	80	46	2	0	0	0	0	0	1	0	0	2	0	0	0	0	0	0	0	0	115	6.63	171	23.1	26.2	26.6	4.1	118.2	249.1	13.8	55	280	13.9		34	44	34
	1	0	0	0	0	0	0	1	48	91	82	99	68	2	1	0	1	0	0	0	0	0	0	1	0	0	0	0	0	0	0	0	147	8.35	370	27.6	37.9	31.2	4.09	66.4	58.9	10.4	144	980	12.8	4.8	39	43	36
	0	0	0	0	0	0	0	4	56	114	82	97	54	70	1	0	1	1	1	1	0	0	0	1	0	0	0	0	0	0	0	0	107	3.43	225	34.9	28	21.5	4.17	233.3	61.7	13.7	214	5400	42.5		49	56	35
	0	0	0	0	0	0	0	1	69	175	83	96	98	45	2	0	0	1	0	0	0	0	0	1	0	0	0	0	0	0	0	0	74	12.01	432	25.9	17.5	30.9	3.43	87.6		44	99	210	54.2		29	35	20
	0	0	0	0	0	0	0	3	62	109	62	92	88	12	3	1	0	0	0	0	0	0	0	1	0	0	0	0	0	0	0	0	127	3.08	166	15.2	33.4	28.9	4.4	48.8	477.4	34.5	108	340	15.9		41	43	34
	0	0	0	0	0	0	0	1	67	91	74	89	78	34	1	0	0	1	0	0	0	0	0	1	0	0	0	0	0	0	0	0	105	4.86	318	27	20.8	19.3	4.5	81.1	153.7	16.3	88	480	23.4	24.1	38	43	42
	0	0	0	0	0	0	0	3	69	125	73	99	88	48	4	0	1	0	0	0	0	0	0	1	0	0	0	0	0	0	0	0	137	12.19	261	30.7	26.3	31.9	4.92	64.2	139.3	46	135	880	4.47		40	47	36
	1	0	0	0	0	0	0	1	80	120	60	98	78	1	1	0	1	0	0	0	0	0	0	1	0	0	0	0	0	0	0	0	78	7.74	192	19.8	38	36.3	4.2	64.9	41.7	34	388	780	44.8	28	33	45	27
	1	0	0	0	0	0	0	1	57	105	72	97	88	59	1	0	0	1	0	1	0	1	0	1	1	0	1	0	0	0	0	0	150	5.66	286	107.9	34.8	21.2	3.71	60.3	166	78	174	880			47	46	49
	0	0	0	0	0	0	0	3	42	102	75	98	70	96	3	0	0	1	0	0	0	0	2	1	0	0	0	0	0	0	0	0	69	8.51	218	60.8	28.4	34	4.03	86.5	337	26	57	1090			41	40	33
	0	0	0	0	0	0	0	1	56	115	76	96	112	66	1	1	0	0	0	0	0	0	0	1	0	0	0	0	0	0	0	0	119	6.89	119	30.2	36	38	4.12	66.8		88	124	180
	0	0	0	0	0	0	0	2	60	95	84	97	99	46	1	0	0	1	0	0	0	0	0	1	0	0	0	0	0	0	0	0	147	11.94	198	28.6	36.3	40.7	4.04	112.5	149	44	146	440		74	33	35	31
	0	0	0	0	0	0	0	1	73	125	78	98	78	1	1	0	1	0	0	0	0	0	0	1	0	0	0	0	0	0	0	0	83	10	168		40	39	4.23	66.6			98	480		34	39	38	37
	0	0	0	0	0	0	0	1	48	92	58	98	109	70	3	0	0	1	0	0	1	0	0	1	0	0	0	0	0	0	0	0	126	10.7	294	31.1	28.6	37	3.93	48.6	89.8	49.8	208	560			37	43	32
	0	0	0	0	0	0	0	1	77	112	72	96	88	45	4	0	1	0	1	0	0	1	0	1	1	1	1	0	0	1	0	0	156	5	154	14.9	33.4	33.8	4.11	66.9	208	16.9	48	660	11.1
	1	0	0	0	0	1	0	1	22	115	60	97	78	12	1	0	0	0	0	0	0	0	0	1	0	0	0	0	0	0	0	0	124	6.2	145	23.3	32.4	37.8	4.4	83.5	199.5	39	280	780	35.1	27.4
	0	0	0	0	0	0	0	3	65	93	70	98	44	34	1	0	0	0	0	0	0	1	0	1	1	1	1	0	0	1	0	0	121	5.3	129			36.7	4.4	89.6	88.7	48	76	480
	0	0	0	0	0	0	0	1	43	110	76	98	80	1	2	0	1	0	0	1	1	0	1	1	0	0	0	0	0	0	0	0	107	4	79	44.8	26	30.7	3.7	58	265.5	32	66	240	17
	0	0	0	0	0	0	0	1	61	116	79	96	68	48	1	0	0	0	0	0	0	1	0	1	1	0	1	0	0	0	0	0	103	4.2	217	27	38.1	35	3.1	43.1	125.3	33.4	86	480	17
	0	0	0	0	0	0	0	1	48	109	63	98	54	59	1	0	0	0	0	0	0	0	1	1	0	0	0	0	0	0	0	0	120	6.7	78		24.2	34.2	4.2	62.5	126.6	22.7	98	670	2.72	42	37	36	34
	0	0	0	0	0	0	0	2	44	102	70	98	98	2	2	0	0	0	0	0	0	0	1	1	0	0	0	0	0	0	0	0	101	8.8	149	19.4	16.3	27.1	3.9	111.1	158	44.7	144	780		8.3	37	44	29
	0	0	0	0	0	0	0	1	70	116	76	98	88	66	3	0	1	0	0	0	0	0	0	1	0	0	0	0	0	0	0	0	154	5.1	161	28.9	32.7	31	3.7	74	137	10	98	880			40	41	30
	1	0	0	0	0	1	0	1	70	108	63	98	78	46	1	0	1	0	1	0	0	1	0	1	1	1	1	1	1	0	0	0	118	6.1	163	48.9	36.5	29.9	4.2	64.1	106.6	24.9	124	780	26.8	16	40	40	30
	0	0	0	0	0	0	0	1	65	100	87	97	88	56	3	0	0	0	1	0	0	0	0	1	0	0	0	0	0	0	0	0	124	17.14	380	35.3	30	35.8	2.9	30.4	323.3	56.8	615	132.3	11.2	44	37	43	27
	0	0	0	0	0	0	0	2	54	124	78	96	88	76	1	0	0	0	1	0	0	1	0	1	1	1	1	0	0	1	0	0	103	6.18	121	28.1	25.5	37.5	4.2	67.9	128.5	14.6	68	564.7	6.89		37	45	38
	1	0	0	0	0	0	0	1	56	125	78	94	70	70	1	0	0	0	0	0	1	0	0	1	0	0	0	0	0	0	0	0	144	6.36	123	48	16.7	40.6	4.2	96.1	150.8	29.4	34.8	278.8	12.13	7.8	39	40	39
	0	0	0	0	0	0	0	3	50	118	63	98	112	45	1	0	1	0	0	0	0	0	0	1	0	0	0	0	0	0	0	0	122	3.59	87	41.2	33.6	37.6	4.5	91.6	665	14.7	78.8	280.4	11.2	4.8	38	43	39
	1	0	0	0	0	0	0	2	58	107	73	98	99	12	3	0	1	1	1	1	0	0	0	1	0	0	0	0	0	0	0	0	109	6.05	234	18.6	28.3	40	3.3	82.8	60.8	23.5	48.6		35.29		39	40	36
	0	0	0	0	0	0	0	2	49	99	73	98	78	34	4	0	1	0	0	0	0	0	0	1	0	0	0	0	0	0	0	0	148	6.2	331	39	33.6	39.4	3.9	70	94.8	37	28		38.4	12.1	39	49	39
	0	0	0	0	0	0	0	1	58	114	58	96	109	48	1	0	0	1	0	1	0	0	0	2	0	0	0	1	0	0	0	1	101	6.49	82	341	336	32.5	4.65	79.2	8890	144	318	1478	219	102	47	46	28
	0	0	0	0	0	0	0	1	66	104	62	97	88	48	1	0	0	1	0	0	0	0	0	1	0	0	0	0	0	0	0	0	127	14.57	197	27.7	31	38.4	4.9	66	302	18.1	78	780	23.67		35	40	25
	0	0	0	0	0	0	0	1	51	108	69	96	78	59	2	1	0	0	0	0	0	0	0	1	0	0	0	0	0	0	0	0	105	4.99	190	26.5	35.5	37.2	4	99.4	107.2	14.6	66	880	14.6	44.5	39	43	30
	0	0	0	0	0	0	0	2	69	120	60	92	44	96	1	0	0	1	0	0	0	0	2	1	0	0	0	0	0	0	0	0	17.8	5.74	131	71.4	30.5	31.4	4.18	74.6	448	14.9	44	780			42	52	35
	1	0	0	0	0	0	0	1	68	110	77	89	80	9	1	0	1	0	0	0	0	0	0	1	0	0	0	0	0	0	0	0	134	8.01	236	25.2	35.9	29.4	4.1	49	211	15.9	66	223.6	8.23	24.1	33	35	33
	1	0	0	0	0	0	0	4	69	120	81	99	68	76	2	0	0	1	0	0	1	0	0	1	0	0	0	0	0	0	0	0	118	6.35	168	36.3	30.7	29.8	3.9	77.1	247.7	34.8	124	564.7			56	43	33
	0	0	0	0	0	0	0	2	61	112	69	98	54	88	3	0	1	0	1	0	0	1	0	1	1	0	1	0	0	0	0	0	117	9	272	9.3	28.5	30.1	4.39	110.9	154.1	19.2	34	278.8		78.8	53	53	33
	0	0	0	0	0	0	0	1	74	129	76	97	98	6	1	0	0	0	0	0	0	0	0	1	0	0	0	0	0	0	0	0	101	6.08	125	16.4	31.6	33.8	3.9	94.6	55.6	25.8	78	280.4			32	43	38
	0	0	0	0	0	0	0	1	57	111	96	98	88	34	4	0	0	0	0	0	0	0	0	1	0	0	0	0	0	0	0	0	104	5	152	18.4	19.9	30.4	4.01	105.6	134.2		66	465.8	16.58
	0	0	0	0	0	0	0	4	53	151	70	96	78	89	1	0	1	0	0	1	1	0	1	1	0	0	0	0	0	0	0	0	125	12.87	133	30	36.5	29.4	4.85	43.7	22400	314	275	322.8			38	38	36
	0	0	0	0	0	0	0	1	68	110	61	97	88	6	3	0	0	0	0	0	0	0	0	1	0	0	0	0	0	0	0	0	112	3.93	88	17.7	38.8	30.3	4.07	348	241.1	17.5	78	788.8		74	30	40	34
	0	0	0	0	0	0	0	1	60	98	72	97	88	45	1	0	0	0	0	0	0	0	1	1	0	0	0	0	0	0	0	0	84	4.62	87	26.3	26.6	28.7	4.28	116	127	58	108	1090		88	30	42	44
	1	0	0	0	0	0	0	1	54	120	57	95	70	12	1	0	0	0	0	0	0	1	1	1	0	1	1	0	1	1	0	0	119	4.86	75	32.2	31.2	41	4.8	103.3	346	34	44	344.8			32	51	42
	0	0	0	0	0	0	0	1	67	100	62	98	112	34	1	0	1	0	0	0	0	0	0	1	0	0	0	0	0	0	0	0	113	5.88	120	27.3	28.9	31.8	3.8	80.3	774.4	12.8	203	223.6	122
	0	0	0	0	0	0	0	4	63	110	86	96	99	48	3	0	1	0	1	0	0	0	0	1	0	0	0	0	0	0	0	0	124	4.24	130	20.3	21.2	36.9	3.3	75.5	119.3	10.1	288	564.7		27.4	34	39	29
	0	0	0	0	0	0	0	1	54	131	77	98	78	1	4	0	0	0	1	0	0	0	0	1	0	0	0	0	0	0	0	0	125	5.93	210	19	27	29.8	4.2	90.5	60.4	15.9	134	278.8			38	38	28
	0	0	0	0	0	0	0	1	54	135	61	98	109	59	1	0	0	0	1	0	0	1	0	1	1	1	1	0	0	1	0	0	132	8.45	225	18.1	25.9	23.9	4	49.6	37.8	14.7	44	288.9	9.86	74.8	44	43	33
	0	0	0	0	0	0	0	1	58	74	76	98	88	96	1	0	0	0	0	0	1	0	0	1	0	0	0	0	0	0	0	0	115	9.16	160	36.2	40.7	33.2	4.7	211	280	13.8	124	465.8			32	39	38
	0	0	0	0	0	0	0	1	52	102	72	98	78	66	2	0	1	0	0	0	0	0	0	1	0	0	0	0	0	0	0	0	100	7.02	255	27.4	26.5	29.8	4.6	54.6	302	19.6	66	322.8		42	31	42	28
	1	0	0	0	0	0	0	3	65	118	80	97	44	1	1	0	1	1	1	1	0	0	0	1	0	0	0	0	0	0	0	0	108	9.92	45	40.3	24.5	33.6	3.85	81.5	432.4	13.2	124	788.8		8.3	38	40	35
	0	0	0	0	0	0	0	2	47	119	95	96	80	88	1	0	0	1	0	0	0	0	0	1	0	0	0	0	0	0	0	0	139	7.5	155	25.2	33.8	34.2	3.87	115.3	337	53.4	278	1448	98.7		30	51	37
	0	0	0	0	0	0	0	1	66	165	54	94	68	76	2	0	1	0	1	0	0	0	0	1	0	0	0	0	0	0	0	0	97	10.76	235	24.9	35	39	3.87	267.8	211	15.3	44	2100	11.18	16	30	32	37
	1	0	0	0	0	0	0	1	66	99	66	98	54	34	3	0	0	1	0	1	0	0	0	1	0	0	0	0	0	0	0	0	161	9.2	137	32.3	35.8	20.1	3.53	88.4	277	17.3	66	880	21.17	34.8	32	48	38
	0	0	0	0	0	0	0	2	48	97	69	94	98	89	1	0	0	1	0	0	0	0	0	1	0	0	0	0	0	0	0	0	108	4.16	165	40.9	40.6	32.7	4.26	91.9	154.1	11.4	38	760.8			37	40	42
	1	0	0	0	0	0	0	2	75	107	72	98	86	23	1	1	0	0	0	0	0	0	0	1	0	0	0	0	0	0	0	0	134	8.77	242	32.1	26.1	30.1	4.32	49.1	354	26.3	56	223.6		7.8	34	51	40
	0	0	0	0	0	0	0	1	66	142	92	99	78	70	3	0	0	1	0	0	0	0	0	1	0	0	0	0	0	0	0	0	128	6.04	117	33.3	21.7	33.3	3.72	66.9	134.2	14.8	30	564.7		4.8	50	53	44
	0	0	0	0	0	0	0	3	72	179	104	97	88	45	1	0	1	0	0	0	0	0	0	1	0	0	0	0	0	0	0	0	136	8.62	96	17.6	31.4	32.4	3.85	67	240	28.6	88	278.8			32	34	30
	0	0	0	0	0	0	0	1	64	174	79	96	78	44	1	0	0	1	0	0	1	0	0	1	0	0	0	0	0	0	0	0	64	4.83	185	15.1	33.8	32.3	2.89	78.6	243	11.2	44	280.4			40	40	30
	0	0	0	0	0	0	0	1	75	119	57	92	88	88	1	0	1	0	1	0	0	0	0	1	0	0	0	0	0	0	0	0	109	7.1	130	31.2	26.2	30.1	4.17	99.2	127	14.3	54	465.8	122.29	99	52	40	35
	0	0	0	0	0	0	0	1	69	97	100	89	70	48	3	0	0	0	0	0	0	0	0	1	0	0	0	0	0	0	0	0	92	3.39	184	25.2	31.8	32.9	4.11	74.9	346	16.5	84.4	322.8
	1	0	0	0	0	0	0	5	50	178	71	99	112	48	4	0	0	0	0	0	0	0	0	1	0	0	0	0	0	0	0	0	110	5.56	287	53.3	23.9	31.1	4.68	100.2	113	16.8	65.7	788.8	148	7.8	45	44	31
	1	0	0	0	0	0	0	1	71	146	75	98	99	59	1	0	1	0	0	1	1	0	1	1	0	0	0	0	0	0	0	0	88	5.9	120	22.2	33.6	30.4	4.1	97.5	425.7	27	89	1100		4.8	28	46	37
	0	0	0	0	0	0	0	1	57	142	69	97	78	96	1	0	0	0	0	0	0	0	0	1	0	0	0	0	0	0	0	0	99	4.57	187	17.1	39	43	4.09	96.1	156	28.8	99	344.8	4.04		32	36	32
	0	0	0	0	0	0	0	3	64	92	60	98	144	66	2	0	0	0	0	0	0	0	1	1	0	0	0	0	0	0	0	0	111	5.53	333	22.2	32.7	38	4.17	58.5	277	18.1	31	223.6	11.72	12.1	31	52	32
	0	0	0	0	0	0	0	2	67	100	77	96	88	46	1	0	0	0	0	0	0	1	1	1	1	1	1	0	1	1	0	0	75	3.38	117	26.2	33.3	33.9	3.43	76.8	377	14.7	46	880	24.6	18	38	44	34
	0	0	0	0	0	0	0	2	66	118	68	97	78	88	1	0	1	0	0	0	0	0	0	1	0	0	0	0	0	0	0	0	118	5.15	161	17.4	27.5	40.7	4.4	533	280	29.6	108	780	3.27		30	34	30
	0	0	0	0	0	0	0	1	70	170	58	97	44	76	2	0	1	0	1	0	0	1	0	1	0	1	1	0	1	1	0	0	101	4.29	184	15.1	30.1	26.2	4.5	87.3	199	38.3	199	223.6	12.17	44.5	30	53	29
	0	0	0	0	0	0	0	2	70	77	86	96	80	34	3	0	0	0	1	0	0	0	0	1	0	0	0	0	0	0	0	0	120	5.88	95	24.6	40.7	35.4	4.92	71.1	258	13.8	66	564.7	5.05
	1	0	0	0	0	0	0	2	69	115	70	92	68	89	1	0	0	0	1	0	0	0	0	1	0	0	0	0	0	0	0	0	114	6.54	170	34.3	21.6	37.9	4.2	78.5	269	24.7	54	278.8		24.1
	0	0	0	0	0	0	0	1	40	121	85	89	54	23	3	0	0	0	0	0	1	0	0	1	0	0	0	0	0	0	0	0	93	6.24	214	40.5	34	25.2	3.22	76.9	235	10.9	34	380.6	12.6		34	41	29
	0	0	0	0	0	0	1	1	53	118	47	99	99	70	1	0	1	0	0	0	0	0	0	1	0	0	0	0	0	0	0	0	108	8.92	146	26.9	35.5	29.8	4.03	57.6	235.9	30.3	98	465.8		78.8			30
	0	0	0	0	0	0	0	2	65	115	63	98	88	45	1	0	1	1	1	1	0	0	0	1	0	0	0	0	0	0	0	0	124	6.11	284	17.1	34.4	36.4	4.12	67.2	147.8	15.6	46	322.8			40	60	45
	0	0	0	0	0	0	0	1	66	103	81	97	78	12	1	0	0	1	0	0	0	0	0	1	0	0	0	0	0	0	0	0	117	6.04	201	72.1	21.8	28	4.04	62.3	244	12.7	24	788.8		7.8	41	51	27
	0	0	0	0	0	0	0	1	63	109	71	98	88	34	3	1	0	0	0	0	0	0	0	1	0	0	0	0	0	0	0	0	108	5.9	165	20.7	32.4	21.6	4.23	60.3	198.8	16.7	34	1090	15.4	4.8	44	27	38
	0	0	0	0	0	0	0	1	68	99	66	96	78	48	4	0	1	0	0	0	0	0	0	1	0	0	0	0	0	0	0	0	134	8.77	242	30	42.7	31.7	3.93	88.2	275	24.8	56	344.8			32	42	39
	1	0	0	0	0	0	0	2	78	121	63	97	78	48	1	0	0	1	0	1	0	0	0	1	0	0	0	0	0	0	0	0	128	6.04	117	34.3	34.6	30.7	4.11	101	262.4	24.5	44	44.6	7.62	12.1	31	39	39
	0	0	0	0	0	1	0	3	54	113	95	97	46	59	1	0	0	1	0	0	0	0	0	1	0	0	0	0	0	0	0	0	136	8.62	96	18.2	24.2	34	4.4	53.6	152	37.8	78	564.7		22	38	47	36
	0	0	0	0	0	0	0	1	54	176	63	95	88	100	2	1	0	0	0	0	0	0	0	1	0	0	0	0	0	0	0	0	64	4.83	185	224.5	145.5	34	4.4	84.2	59.4	37.2	109	278.8	13.9		30	45	39
	1	0	0	0	0	0	0	1	58	115	71	98	78	66	1	0	0	1	0	0	0	0	0	1	0	0	0	0	0	0	0	0	109	7.1	130	38.3	35.2	24.6	3.7	78.5	96.8	10	34	288.9		44.5	30	42	40
	0	0	0	0	0	0	0	3	52	110	86	96	88	46	1	0	1	0	0	0	0	0	0	1	0	0	0	0	0	0	0	0	92	3.39	184	28.8	38.2	33.4	3.1	69.7	70	10.2	78	880	34		32	53	33
	1	0	0	0	0	0	0	2	65	133	55	97	88	1	2	0	0	1	0	0	1	0	0	1	0	0	0	0	0	0	0	0	110	5.56	287	46.6	41.8	32.1	4.2	70.9	44.2	9.4	38	780		24.1	37	45	30
	0	0	0	0	0	0	0	1	47	99	63	96	70	76	3	0	1	0	1	0	0	1	0	1	1	1	1	0	1	1	0	0	88	4.1	120	49.7	41	35.5	3.9	62	54.4	27.8	88	223.6			34	42	35
	0	0	0	0	0	1	0	2	66	129	70	92	122	34	1	0	0	0	0	0	0	0	0	1	0	0	0	0	0	0	0	0	110	4.57	187	32.2	34.4	32.4	3.7	93.8	105.6	37.7	128	564.7	63.2	38.8	43	40	41
	0	0	0	0	0	0	1	1	66	100	65	89	99	44	1	0	0	0	0	0	0	0	0	1	0	0	0	0	0	0	0	0	111	5.53	333	37.3	30.4	40.7		97.7	47.3	14.6	48	278.8	4.65
	0	0	0	0	0	0	0	3	48	106	54	99	78	70	2	0	1	0	0	1	1	0	1	1	0	0	0	0	0	0	0	0	75	3.38	117	31.2	35.9	26.2	2.99	88.6		18.3	66	280.4	13.4		32	60	31
	0	0	0	0	0	0	0	1	70	106	71	97	109	45	1	0	0	0	0	0	0	0	0	1	0	0	0	0	0	0	0	0	118	5.15	161	132.1	25.9	35.4	4.2	92.1	86.5	28.7	88	465.8	91.7		31	51	37
	1	0	0	0	0	0	0	1	54	112	61	96	88	12	1	0	1	0	0	0	0	0	0	1	0	0	0	0	0	0	0	0	101	4.29	184	34.4	37.9	37.9	4.2	57.9	167.8	18.7	46.8	288.7		14.6	38	42	32
	1	0	0	0	0	0	0	2	54	80	51	92	60	34	1	0	0	1	0	1	0	0	0	1	0	0	0	0	0	0	0	0	120	5.5	95	15.2	27.2	25.2	4.5	81.6	103.1	29	120	788.8		24.1	30	46	32
	0	0	0	0	0	0	0	1	58	94	74	89	44	48	3	0	0	1	0	0	0	0	0	1	0	0	0	0	0	0	0	0	114	6.54	170	31	37.6	29.8	3.3	99.1	134.3	20.9	88	1842	12.66		30	53	34
	0	0	0	0	0	0	0	1	52	114	57	99	80	28	4	1	0	0	0	0	0	0	0	1	0	0	0	0	0	0	0	0	93	6.24	214	31.2	34	36.4	3.9	93.7	76.3	13.8	44	344.8	56.2		32	40	30
	0	0	0	0	0	0	0	1	65	88	54	98	68	67	1	0	0	1	0	0	0	0	0	1	0	0	0	0	0	0	0	0	108	4.16	165	39.2	33.8	28	4.65	91.4	97.3	17.6	46	880		27.4	37	36	29
	0	0	0	0	0	0	0	2	47	118	58	97	54	98	1	0	1	0	0	0	0	0	2	1	0	0	0	0	0	0	0	0	134	8.77	242	25.9	33.4	21.6	4.9	91.8	111.4	39.8	124	780	10.5		34	45	33
	0	0	0	0	0	1	0	1	66	110	79	98	98	66	2	0	0	1	0	0	1	0	0	1	0	0	0	0	0	0	0	0	128	6.04	117	70.5	23.4	31.7	4	73.1	103.4	16.9	46	223.6	8.14	66.3	45	49	41
	0	0	0	0	0	0	0	1	66	113	62	96	88	46	1	0	1	0	1	0	0	1	0	1	1	1	1	0	1	1	0	0	136	8.62	96	33.9	29.1	40.7	4.18	101.1	357.7	16.8	128	1243	4.72		41	37	29
	1	0	0	0	0	0	0	2	48	129	71	97	78	36	1	0	0	0	0	0	0	0	0	1	0	0	0	0	0	0	0	0	88	4.83	185	33.3	33.5	26.2	4.1	89.4		74.7	248	278.8		42	32	42	30
	0	0	0	0	0	0	0	1	75	100	34	97	88	76	3	0	0	0	0	0	0	0	0	1	0	0	0	0	0	0	0	0	109	7.1	130	47	37.8	35.4	3.9	252	461.7	13.3	47.8	280.4	8.38	8.3	31	37	45
	0	0	0	0	0	0	0	2	54	106	49	95	78	34	1	0	1	0	0	1	1	0	1	1	0	0	0	0	0	0	0	0	92	3.39	184	24.2	27.5	37.9	4.11	94.6	288.7	18.1	36	465.8			38	37	27
	0	0	0	0	0	0	0	1	54	106	49	98	78	12	1	0	0	0	0	0	0	0	0	1	0	0	0	0	0	0	0	0	110	5.56	287	29.2	25.9	25.2	3.72	93.7	125.5	13.3	68	346.8		14	30	43	38
	0	0	0	0	0	0	0	1	58	112	78	96	46	23	1	0	0	0	0	0	0	0	1	1	0	0	0	0	0	0	0	0	88	4.1	120	12.5	33.7	29.8	3.85	77.4	284.6	14.7	88	788.8		34.8			39
	0	0	0	0	0	0	0	2	52	80	73	98	88	23	1	0	0	0	0	0	0	1	1	1	1	1	1	0	1	1	0	0	109	4.57	187	24.8	30	36.4	3.01	91.8	266.4	38.6	78	1090	20.2		32	35	39
	0	0	0	0	0	0	0	2	65	142	71	98	78	68	4	0	1	0	0	0	0	0	0	1	0	0	0	0	0	0	0	0	111	5.53	333	43.4	29.3	28	4.17	73.1	107.5	14.5	56	344.8	13	7.8	37	46	36
	0	0	0	0	0	0	0	1	47	114	72	98	88	1	1	0	1	0	1	0	0	0	0	1	0	0	0	0	0	0	0	0	75	3.38	117	38.5	54.6	21.6	4.11	114.6	167	19.8	128	223.4	85	14.8	34	48	39
[truncated: 21 more columns]
